# Supplementary material
Source: PubMed Central journal article supplement (PMC7474850)
Supplement: NIHMS1602621-supplement-Supplemental_Material.pdf [file NIHMS1602621-supplement-Supplemental_Material.pdf]

**SUPPLEMENTAL MATERIAL**

1  
 2 Supplemental Table 1. Comparison of baseline characteristics in subjects enrolled in AHF trials.  
 3 Subjects in ROSE-AHF were less likely to be on ACEi/ARB therapy at baseline, were more  
 4 likely to be on sequential nephron blockade as outpatient therapy, and had lower total urine  
 5 output during the course of the hospitalization compared to subjects enrolled in DOSE-AHF and  
 6 CARRESS-HF.

|                                                | <b>DOSE/CARRESS</b><br><b>N=379</b> | <b>ROSE</b><br><b>N=342</b> | <b>P-Value</b> |
|------------------------------------------------|-------------------------------------|-----------------------------|----------------|
| Age, years                                     | 66 ± 14                             | 70 ± 12                     | 0.001          |
| Male                                           | 277 (73)                            | 251 (73)                    | 0.9            |
| Black                                          | 91 (24)                             | 69 (20)                     | 0.2            |
| Hypertension                                   | 312 (82)                            | 282 (83)                    | 1.0            |
| Diabetes mellitus                              | 214 (57)                            | 188 (55)                    | 0.7            |
| Nonischemic HF etiology                        | 202 (53)                            | 190 (56)                    | 0.5            |
| Ejection Fraction, %                           | 36 ± 18                             | 37 ± 17                     | 0.4            |
| Heart Failure with Preserved Ejection Fraction | 110 (30)                            | 107 (32)                    | 0.6            |
| NYHA Class                                     |                                     |                             | 0.2            |
| • 1-2                                          | 10 (3)                              | 16 (5)                      |                |
| • 3                                            | 218 (63)                            | 220 (67)                    |                |
| • 4                                            | 116 (34)                            | 92 (28)                     |                |
| Medical therapy                                |                                     |                             |                |
| • ACEi/ARB                                     | 226 (61)                            | 171 (51)                    | 0.008          |
| • Beta-blocker                                 | 309 (83)                            | 283 (84)                    | 0.7            |
| • Aldosterone receptor antagonist              | 98 (26)                             | 104 (31)                    | 0.2            |
| • Hydralazine                                  | 65 (17)                             | 62 (18)                     | 0.7            |
| • Nitrates                                     | 118 (32)                            | 84 (25)                     | 0.048          |

|                                                  |                      |                     |        |
|--------------------------------------------------|----------------------|---------------------|--------|
| • Digoxin                                        | 100 (27)             | 83 (25)             | 0.5    |
| • Loop diuretic dose (mg furosemide equivalents) | 120 (80, 160)        | 80 (60, 160)        | <0.001 |
| • Sequential nephron blockade                    | 23 (6)               | 63 (19)             | <0.001 |
| Body mass index, kg/m <sup>2</sup>               | 34 ± 10              | 32 ± 8              | 0.012  |
| Systolic blood pressure, mm Hg                   | 118 ± 19             | 117 ± 19            | 0.5    |
| Diastolic blood pressure, mm Hg                  | 68 ± 14              | 66 ± 11             | 0.042  |
| Total urine output, L                            | 11.5 ± 6.0           | 8.5 ± 3.2           | <0.001 |
| Serum chemistries                                |                      |                     |        |
| • Sodium, mg/dL                                  | 138.0 ± 3.8          | 138.3 ± 3.7         | 0.5    |
| • Total bilirubin, mg/dL                         | 1.2 ± 0.8            | 1.1 ± 0.7           | 0.4    |
| • Blood urea nitrogen, mg/dL                     | 37 (23, 55)          | 37 (27, 51)         | 0.3    |
| • Creatinine, mg/dL                              | 1.7 ± 0.6            | 1.8 ± 0.6           | 0.1    |
| • eGFR, mL/min/1.72m <sup>2</sup>                | 49 ± 24              | 43 ± 14             | <0.001 |
| • NT-pro BNP (pg/mL)                             | 4,190 (2,193, 9,826) | 4,724 (2,330,9,821) | 0.3    |
| Days from randomization to discharge             | 6 (4, 9)             | 6 (4, 9)            | 0.4    |

1

2 Values are mean ± SD, median (interquartile range), or N (%).

Supplemental Table 2. Baseline characteristics of subjects according to race and PRA categories.

|                                     | <b>Non-Black,<br/>low PRA<br/>N=136</b> | <b>Non-Black,<br/>high PRA<br/>N=136</b> | <b>P-value</b> | <b>Black,<br/>low PRA<br/>N=40</b> | <b>Black,<br/>high PRA<br/>N=40</b> | <b>P-value</b> |
|-------------------------------------|-----------------------------------------|------------------------------------------|----------------|------------------------------------|-------------------------------------|----------------|
| Age, years                          | 71 ± 11                                 | 68 ± 12                                  | 0.02           | 56 ± 14                            | 56 ± 14                             | 0.9            |
| Male                                | 93 (68)                                 | 107 (79)                                 | 0.05           | 26 (65)                            | 33 (83)                             | 0.08           |
| Hypertension                        | 107 (79)                                | 112 (82)                                 | 0.4            | 38 (95)                            | 33 (83)                             | 0.1            |
| Diabetes mellitus                   | 81 (60)                                 | 79 (58)                                  | 0.8            | 22 (55)                            | 17 (43)                             | 0.3            |
| Ejection Fraction, %                | 38 ± 18                                 | 37 ± 18                                  | 0.5            | 31 ± 16                            | 32 ± 16                             | 0.8            |
| HF with Preserved Ejection Fraction | 45 (34)                                 | 41 (30)                                  | 0.4            | 9 (22)                             | 8 (21)                              | 0.8            |
| Years since HF diagnosis            | 6.0 ± 6.6                               | 6.9 ± 7.5                                | 0.3            | 4.4 ± 4.0                          | 4.1 ± 3.8                           | 0.7            |
| # CV hospitalizations               | 1.9 ± 1.7                               | 1.7 ± 1.4                                | 0.3            | 2.7 ± 2.4                          | 2.5 ± 2.8                           | 0.7            |
| # HF hospitalizations               | 1.5 ± 1.5                               | 1.3 ± 1.3                                | 0.4            | 2.4 ± 2.3                          | 2.1 ± 1.9                           | 0.5            |
| Medical therapy                     |                                         |                                          |                |                                    |                                     |                |
| • ACEi/ARB                          | 78 (58)                                 | 77 (58)                                  | 1.0            | 31 (78)                            | 23 (58)                             | 0.06           |
| • Beta-blocker                      | 112 (84)                                | 105 (79)                                 | 0.3            | 35 (88)                            | 36 (90)                             | 1.0            |
| • Aldosterone receptor antagonist   | 19 (14)                                 | 46 (35)                                  | <0.0001        | 11 (28)                            | 16 (40)                             | 0.2            |
| • Hydralazine                       | 15 (11)                                 | 13 (10)                                  | 0.7            | 13 (33)                            | 16 (40)                             | 0.5            |

|                                                  |                       |                      |         |                       |                      |         |
|--------------------------------------------------|-----------------------|----------------------|---------|-----------------------|----------------------|---------|
| • Nitrates                                       | 39 (29)               | 37 (28)              | 0.8     | 16 (40)               | 18 (45)              | 0.7     |
| • Digoxin                                        | 23 (17)               | 42 (32)              | 0.005   | 11 (28)               | 15 (38)              | 0.3     |
| • Loop diuretic dose (mg furosemide equivalents) | 119 ± 78              | 164 ± 108            | <0.0001 | 111 ± 47              | 146 ± 81             | 0.021   |
| • Sequential nephron blockade                    | 3 (2)                 | 15 (11)              | 0.006   | 1 (3)                 | 2 (5)                | 0.6     |
| Body mass index, kg/m <sup>2</sup>               | 33 ± 7                | 34 ± 11              | 0.1     | 38 ± 12               | 35 ± 11              | 0.3     |
| Systolic blood pressure, mm Hg                   | 123 ± 20              | 112 ± 15             | <0.0001 | 132 ± 20              | 112 ± 15             | <0.0001 |
| Diastolic blood pressure, mm Hg                  | 68 ± 15               | 64 ± 11              | 0.014   | 80 ± 16               | 70 ± 12              | 0.001   |
| Serum chemistries                                |                       |                      |         |                       |                      |         |
| • Sodium, mg/dL                                  | 139.5 ± 3.2           | 136.3 ± 4.1          | <0.0001 | 139.5 ± 2.6           | 137.3 ± 3.1          | 0.001   |
| • Potassium, mg/dL                               | 4.0 ± 0.6             | 4.1 ± 0.6            | 0.4     | 3.8 ± 0.5             | 3.9 ± 0.5            | 0.2     |
| • Blood urea nitrogen, mg/dL                     | 35 (24, 53)           | 46 (28, 66)          | 0.035   | 24 (13, 43)           | 33 (16, 50)          | 0.4     |
| • Creatinine, mg/dL                              | 1.6 ± 0.6             | 1.7 ± 0.6            | 0.09    | 1.5 ± 0.6             | 1.8 ± 0.6            | 0.05    |
| • eGFR, mL/min/1.72m <sup>2</sup>                | 49 ± 22               | 46 ± 21              | 0.3     | 67 ± 29               | 61 ± 31              | 0.2     |
| • NT-pro BNP (pg/mL)                             | 4,441 (2,453, 12,095) | 4,072 (2,267, 8,781) | 0.2     | 4,558 (2,212, 11,331) | 2,636 (1,293, 8,440) | 0.2     |
| Days from randomization to discharge             | 6.9 ± 7.0             | 9.7 ± 9.2            | 0.009   | 6.9 ± 6.5             | 8.3 ± 6.7            | 0.4     |
